# Supplementary material for: A Spider Toxin Exemplifies the Promises and Pitfalls of Cell-Free Protein Production for Venom Biodiscovery
Source: MDPI journal article supplement (doi:10.3390/toxins13080575), 2021-08-18
Supplement: s1 [file s1]

# Supplementary Materials: A Spider Toxin Exemplifies the Promises and Pitfalls of Cell-Free Protein Production for Venom Biodiscovery

Tim Lüddecke, Anne Paas, Lea Talmann, Kim N. Kirchhoff, Björn M. von Reumont, André Billion, Thomas Timm, Günter Lochnit and Andreas Vilcinskas

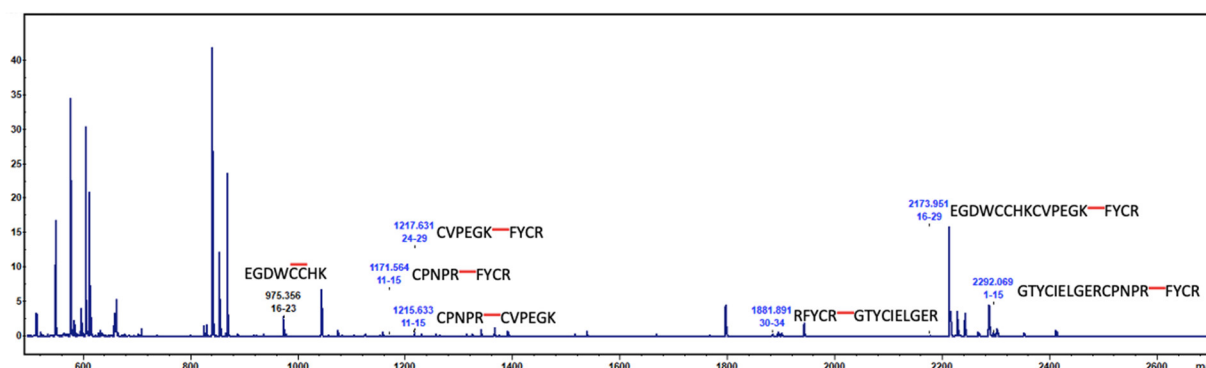

**Figure S1.** MALDI-spectrum of trypsinized USCTX. The  $m/z$  values corresponding to peptides crosslinked via cysteines are highlighted in blue and are labeled with the crosslinked peptide sequences. The data show a sequence coverage of 94 %, missing only the C-terminal two amino acids (due to a cut off below  $m/z$  500).
